# Supplementary material for: Interaction Networks Help to Infer the Vulnerability of the Saproxylic Beetle Communities That Inhabit Tree Hollows in Mediterranean Forests
Source: MDPI journal article supplement (doi:10.3390/insects14050446), 2023-05-09
Supplement: s1 [file s1]

**Table S1** Species list and abundance of saproxylic beetles in each woodland type in 2009-2010 and 2021-2022.Qp: *Quercus pyrenaica*, Fr: *Faxinus angustifolia*, Qi: *Quercus ilex*

| Family        | Species                               | 2009/2010 |    |     | 2021/2022 |     |     | TOTAL |
|---------------|---------------------------------------|-----------|----|-----|-----------|-----|-----|-------|
|               |                                       | Qp        | Fr | Qi  | Qp        | Fr  | Qi  |       |
| Aderidae      | <i>Aderus populneus</i>               | 14        | 7  | 3   | 6         | 0   | 0   | 30    |
|               | <i>Cnopus minor</i>                   | 0         | 0  | 1   | 1         | 0   | 0   | 2     |
|               | <i>Otolelus neglectus</i>             | 0         | 0  | 1   | 0         | 0   | 0   | 1     |
| Anthicidae    | <i>Microhoria</i> cf. <i>fasciata</i> | 0         | 0  | 0   | 1         | 0   | 0   | 1     |
|               | <i>Microhoria</i> sp.                 | 0         | 0  | 1   | 0         | 0   | 0   | 1     |
| Biphyllidae   | <i>Diplocoelus fagi</i>               | 1         | 14 | 3   | 0         | 0   | 0   | 18    |
| Brentidae     | <i>Amorphocephala coronata</i>        | 0         | 0  | 0   | 2         | 0   | 0   | 2     |
| Buprestidae   | <i>Acmaeodera degener</i>             | 0         | 0  | 2   | 0         | 0   | 4   | 6     |
|               | <i>Acmaeoderella cyanipennis</i>      | 0         | 0  | 0   | 0         | 0   | 1   | 1     |
|               | <i>Eurythyrea quercus</i>             | 1         | 0  | 0   | 3         | 0   | 0   | 4     |
| Carabidae     | <i>Acupalpus cantabricus</i>          | 1         | 0  | 0   | 0         | 0   | 0   | 1     |
|               | <i>Asaphidion stierlini</i>           | 1         | 0  | 0   | 0         | 0   | 0   | 1     |
|               | <i>Bembidion obtusum</i>              | 0         | 0  | 0   | 0         | 1   | 0   | 1     |
|               | <i>Bembidion tethys</i>               | 3         | 0  | 0   | 0         | 0   | 0   | 3     |
|               | <i>Brachinus sclopeta</i>             | 0         | 0  | 1   | 0         | 0   | 0   | 1     |
|               | <i>Calathus cinctus</i>               | 0         | 0  | 0   | 0         | 1   | 0   | 1     |
|               | <i>Calathus granatensis</i>           | 260       | 79 | 236 | 42        | 240 | 196 | 1053  |
|               | <i>Calathus mollis</i>                | 0         | 0  | 0   | 0         | 1   | 0   | 1     |
|               | <i>Calodromius bifasciatus</i>        | 0         | 0  | 0   | 1         | 0   | 0   | 1     |
|               | <i>Carabus lusitanicus</i>            | 1         | 0  | 0   | 0         | 0   | 7   | 8     |
|               | <i>Cryptophonus tenebrosus</i>        | 0         | 0  | 1   | 0         | 0   | 0   | 1     |
|               | <i>Leistus expansus</i>               | 2         | 0  | 0   | 0         | 0   | 0   | 2     |
|               | <i>Masoreus wetterhallii</i>          | 0         | 0  | 1   | 0         | 0   | 0   | 1     |
|               | <i>Notiophilus marginatus</i>         | 0         | 0  | 0   | 1         | 0   | 0   | 1     |
|               | <i>Porotachys bisulcatus</i>          | 0         | 1  | 0   | 0         | 0   | 0   | 1     |
|               | <i>Steropus globosus</i>              | 1         | 0  | 4   | 0         | 0   | 0   | 5     |
|               | <i>Syntomus foveatus</i>              | 1         | 0  | 1   | 0         | 0   | 1   | 3     |
|               | <i>Trechus obtusus</i>                | 3         | 0  | 1   | 0         | 6   | 0   | 10    |
| Cerambycidae  | <i>Alocerus moesiacus</i>             | 2         | 0  | 7   | 1         | 0   | 4   | 14    |
|               | <i>Cerambyx welensii</i>              | 0         | 0  | 0   | 2         | 0   | 0   | 2     |
|               | <i>Prinobius myardi</i>               | 0         | 1  | 1   | 0         | 0   | 0   | 2     |
|               | <i>Stictoleptura trisignata</i>       | 5         | 1  | 6   | 2         | 2   | 3   | 19    |
| Cetoniidae    | <i>Cetonia aurataeformis</i>          | 96        | 65 | 21  | 7         | 9   | 2   | 200   |
|               | <i>Protaetia cuprea</i>               | 4         | 10 | 12  | 1         | 4   | 2   | 33    |
|               | <i>Protaetia opaca</i>                | 1         | 4  | 2   | 1         | 4   | 4   | 16    |
| Ciidae        | <i>Cis striatulus</i>                 | 0         | 0  | 0   | 0         | 0   | 1   | 1     |
| Clambidae     | <i>Calyptromerus dubius</i>           | 0         | 1  | 0   | 1         | 2   | 0   | 4     |
| Cleridae      | <i>Opilo domesticus</i>               | 1         | 1  | 3   | 0         | 0   | 2   | 7     |
| Corylophidae  | <i>Arthrolips</i> sp.                 | 0         | 0  | 0   | 1         | 0   | 0   | 1     |
| Curculionidae | <i>Camptorhinus statua</i>            | 38        | 2  | 8   | 3         | 0   | 0   | 51    |
|               | <i>Dryocoetes villosus</i>            | 0         | 0  | 0   | 2         | 0   | 0   | 2     |
|               | <i>Platypus cylindrus</i>             | 0         | 0  | 1   | 1         | 0   | 0   | 2     |
|               | <i>Xyleborinus saxesenii</i>          | 6         | 13 | 2   | 0         | 0   | 0   | 21    |

|                |                                   |    |    |    |    |   |   |     |
|----------------|-----------------------------------|----|----|----|----|---|---|-----|
|                | <i>Xyleborus dryographus</i>      | 1  | 3  | 0  | 3  | 0 | 0 | 7   |
|                | <i>Xyleborus monographus</i>      | 61 | 62 | 45 | 93 | 0 | 1 | 262 |
| Dermestidae    | <i>Anthrenus angustefasciatus</i> | 0  | 0  | 0  | 0  | 0 | 1 | 1   |
|                | <i>Anthrenus festivus</i>         | 1  | 4  | 0  | 12 | 4 | 1 | 22  |
|                | <i>Anthrenus minutus</i>          | 0  | 21 | 1  | 0  | 0 | 1 | 23  |
|                | <i>Anthrenus munroi</i>           | 0  | 0  | 0  | 1  | 0 | 0 | 1   |
|                | <i>Anthrenus verbasci</i>         | 0  | 3  | 2  | 0  | 0 | 0 | 5   |
|                | <i>Attagenus trifasciatus</i>     | 0  | 7  | 2  | 0  | 1 | 2 | 12  |
|                | <i>Dermestes bicolor</i>          | 1  | 0  | 0  | 0  | 0 | 0 | 1   |
|                | <i>Dermestes hispanicus</i>       | 0  | 0  | 4  | 0  | 0 | 0 | 4   |
|                | <i>Dermestes undulatus</i>        | 0  | 0  | 0  | 0  | 0 | 1 | 1   |
|                | <i>Orphilus niger</i>             | 0  | 0  | 0  | 0  | 1 | 0 | 1   |
|                | <i>Paranovelsis aequalis</i>      | 0  | 0  | 2  | 7  | 0 | 0 | 9   |
|                | <i>Thorictus cf grandicollis</i>  | 0  | 0  | 0  | 2  | 0 | 0 | 2   |
|                | <i>Trogoderma inclusum</i>        | 0  | 0  | 0  | 0  | 1 | 0 | 1   |
| Dynastidae     | <i>Oryctes nasicornis</i>         | 0  | 0  | 0  | 0  | 0 | 1 | 1   |
| Elateridae     | <i>Ampedus aurilegulus</i>        | 20 | 18 | 0  | 6  | 2 | 0 | 46  |
|                | <i>Athous obsoletus</i>           | 0  | 0  | 0  | 2  | 0 | 0 | 2   |
|                | <i>Cardiophorus signatus</i>      | 0  | 0  | 0  | 5  | 2 | 1 | 8   |
|                | <i>Cnemeplatia rufa</i>           | 0  | 0  | 0  | 0  | 2 | 0 | 2   |
|                | <i>Ectamenogonus montandoni</i>   | 0  | 5  | 0  | 0  | 0 | 0 | 5   |
|                | <i>Elater ferrugineus</i>         | 11 | 7  | 0  | 4  | 1 | 0 | 23  |
|                | <i>Elathous platiai</i>           | 0  | 0  | 1  | 0  | 0 | 0 | 1   |
|                | <i>Ischnodes sanguinicollis</i>   | 19 | 13 | 0  | 0  | 2 | 0 | 34  |
|                | <i>Lacon punctatus</i>            | 2  | 4  | 0  | 2  | 4 | 0 | 12  |
|                | <i>Limoniscus violaceus</i>       | 0  | 1  | 0  | 0  | 1 | 0 | 2   |
|                | <i>Megapenthes lugens</i>         | 6  | 8  | 0  | 0  | 4 | 0 | 18  |
|                | <i>Melanotus dichrous</i>         | 0  | 0  | 0  | 0  | 0 | 2 | 2   |
|                | <i>Prokraerus tibialis</i>        | 1  | 7  | 0  | 3  | 5 | 0 | 16  |
| Endomychidae   | <i>Cholovocera formicaria</i>     | 0  | 0  | 0  | 0  | 0 | 2 | 2   |
|                | <i>Symbiotes gibberosus</i>       | 1  | 2  | 0  | 1  | 2 | 0 | 6   |
| Eucinetidae    | <i>Nycteus meridionalis</i>       | 1  | 0  | 0  | 0  | 0 | 0 | 1   |
| Histeridae     | <i>Abraeus perpusillus</i>        | 9  | 7  | 0  | 7  | 0 | 0 | 23  |
|                | <i>Aeletes atomarius</i>          | 0  | 1  | 0  | 1  | 0 | 0 | 2   |
|                | <i>Gnathoncus communis</i>        | 22 | 12 | 0  | 9  | 0 | 3 | 46  |
|                | <i>Gnathoncus nannetensis</i>     | 8  | 4  | 0  | 47 | 5 | 1 | 65  |
|                | <i>Hetaerius ferrugineus</i>      | 1  | 0  | 0  | 5  | 0 | 1 | 7   |
|                | <i>Kissister minimus</i>          | 0  | 0  | 6  | 6  | 0 | 2 | 14  |
|                | <i>Margarinotus merdarius</i>     | 4  | 2  | 3  | 7  | 4 | 1 | 21  |
|                | <i>Margarinotus uncostriatus</i>  | 0  | 0  | 0  | 11 | 0 | 0 | 11  |
|                | <i>Merohister ariasi</i>          | 1  | 1  | 3  | 1  | 0 | 1 | 7   |
|                | <i>Onthophilus sp.</i>            | 0  | 0  | 0  | 0  | 0 | 7 | 7   |
|                | <i>Paromalus flavicornis</i>      | 22 | 3  | 0  | 4  | 2 | 0 | 31  |
|                | <i>Platylomalus complanatus</i>   | 0  | 1  | 0  | 0  | 0 | 0 | 1   |
|                | <i>Platysoma filiforme</i>        | 1  | 1  | 0  | 8  | 0 | 0 | 10  |
| Laemophloeidae | <i>Cryptolestes ferrugineus</i>   | 1  | 0  | 1  | 1  | 0 | 0 | 3   |
|                | <i>Laemophloeus nigricollis</i>   | 0  | 1  | 0  | 0  | 0 | 0 | 1   |
|                | <i>Placonotus testaceus</i>       | 1  | 1  | 0  | 0  | 0 | 0 | 2   |
| Lucanidae      | <i>Dorcus parallelipipedus</i>    | 7  | 9  | 0  | 3  | 5 | 0 | 24  |

|                |                                          |     |    |    |    |     |    |     |
|----------------|------------------------------------------|-----|----|----|----|-----|----|-----|
|                | <i>Pseudolucanus barbarossa</i>          | 0   | 0  | 0  | 1  | 0   | 0  | 1   |
| Melandryidae   | <i>Orchesia micans</i>                   | 1   | 2  | 0  | 19 | 5   | 0  | 27  |
| Melyridae      | <i>Anthocomus fenestratus</i>            | 10  | 1  | 4  | 5  | 0   | 0  | 20  |
|                | <i>Aplocnemus limbipennis</i>            | 0   | 1  | 0  | 2  | 1   | 0  | 4   |
|                | <i>Axinotarsus marginalis</i>            | 0   | 0  | 4  | 0  | 0   | 2  | 6   |
|                | <i>Falsomelyris andalusiaca</i>          | 0   | 2  | 0  | 0  | 0   | 0  | 2   |
|                | <i>Hypebaeus albifrons</i>               | 2   | 0  | 0  | 1  | 0   | 0  | 3   |
|                | <i>Mauroania bourgeoisi</i>              | 1   | 0  | 1  | 3  | 0   | 1  | 6   |
|                | <i>Troglops furcatus</i>                 | 18  | 5  | 9  | 5  | 7   | 1  | 45  |
| Mycetophagidae | <i>Litargus connexus</i>                 | 7   | 2  | 0  | 0  | 0   | 0  | 9   |
|                | <i>Mycetophagus quadriguttatus</i>       | 44  | 4  | 2  | 14 | 0   | 0  | 64  |
| Nitidulidae    | <i>Amphotis marginata</i>                | 1   | 0  | 0  | 0  | 0   | 0  | 1   |
|                | <i>Carpophilus</i> cf. <i>dimidiatus</i> | 0   | 0  | 0  | 1  | 0   | 0  | 1   |
|                | <i>Cryptarcha strigata</i>               | 0   | 0  | 0  | 1  | 0   | 0  | 1   |
|                | <i>Epuraea fuscicollis</i>               | 95  | 0  | 5  | 76 | 2   | 3  | 181 |
|                | <i>Soronia oblonga</i>                   | 56  | 3  | 2  | 46 | 6   | 4  | 117 |
| Oedemeridae    | <i>Ischnomera xanthoderes</i>            | 24  | 14 | 24 | 23 | 80  | 7  | 172 |
| Ptinidae       | <i>Dignomus irroratus</i>                | 0   | 1  | 0  | 2  | 0   | 0  | 3   |
|                | <i>Dorcatoma agenjoi</i>                 | 7   | 0  | 0  | 2  | 0   | 1  | 10  |
|                | <i>Mizodorcatoma dommeri</i>             | 0   | 0  | 0  | 0  | 1   | 0  | 1   |
|                | <i>Niptodes ferrugulus</i>               | 0   | 0  | 0  | 5  | 0   | 0  | 5   |
|                | <i>Oligomerus brunneus</i>               | 6   | 1  | 0  | 10 | 0   | 0  | 17  |
|                | <i>Ptinus bidens</i>                     | 5   | 1  | 1  | 10 | 3   | 0  | 20  |
|                | <i>Ptinus hirticornis</i>                | 1   | 0  | 1  | 1  | 3   | 1  | 7   |
|                | <i>Ptinus obesus</i>                     | 0   | 0  | 0  | 0  | 0   | 1  | 1   |
|                | <i>Ptinus pyrenaeus</i>                  | 0   | 0  | 0  | 1  | 0   | 0  | 1   |
|                | <i>Ptinus spitzyi</i>                    | 0   | 0  | 0  | 5  | 0   | 0  | 5   |
|                | <i>Ptinus timidus</i>                    | 159 | 55 | 6  | 13 | 6   | 2  | 241 |
|                | <i>Rhamna semen</i>                      | 6   | 3  | 6  | 93 | 2   | 2  | 112 |
|                | <i>Stagetus elongatus</i>                | 0   | 2  | 0  | 0  | 0   | 0  | 2   |
|                | <i>Stagetus micoae</i>                   | 0   | 1  | 0  | 5  | 1   | 3  | 10  |
| Salpingidae    | <i>Salpingus tapirus</i>                 | 0   | 0  | 0  | 1  | 0   | 0  | 1   |
|                | <i>Sphaeriestes reyi</i>                 | 0   | 0  | 0  | 0  | 0   | 3  | 3   |
| Scirtidae      | <i>Prionocyphon serricornis</i>          | 13  | 18 | 11 | 18 | 118 | 26 | 204 |
| Scraphiidae    | <i>Anaspis regimbarti</i>                | 9   | 1  | 0  | 0  | 0   | 0  | 10  |
|                | <i>Scraptia testacea</i>                 | 13  | 25 | 9  | 0  | 0   | 0  | 47  |
| Silvanidae     | <i>Ahasverus advena</i>                  | 1   | 0  | 0  | 0  | 0   | 0  | 1   |
|                | <i>Airaphilus peyerimhoffi</i>           | 0   | 0  | 0  | 1  | 0   | 1  | 2   |
|                | <i>Oryzaeophilus surinamensis</i>        | 0   | 0  | 1  | 0  | 0   | 1  | 2   |
|                | <i>Silvanus bidentatus</i>               | 0   | 2  | 0  | 0  | 0   | 0  | 2   |
|                | <i>Uleiota planata</i>                   | 4   | 1  | 0  | 0  | 0   | 0  | 5   |
| Tenebrionidae  | <i>Cnemeplatia rufa</i>                  | 0   | 0  | 0  | 2  | 0   | 0  | 2   |
|                | <i>Corticeus fasciatus</i>               | 1   | 0  | 0  | 3  | 0   | 0  | 4   |
|                | <i>Eledonoprius armatus</i>              | 7   | 0  | 0  | 2  | 0   | 0  | 9   |
|                | <i>Euboeus anthracinus</i>               | 14  | 4  | 2  | 12 | 0   | 0  | 32  |
|                | <i>Euboeus granulatus</i>                | 0   | 0  | 1  | 1  | 0   | 2  | 4   |
|                | <i>Isomira hispanica</i>                 | 0   | 1  | 8  | 0  | 1   | 2  | 12  |
|                | <i>Mycetochara linearis</i>              | 1   | 15 | 0  | 2  | 1   | 0  | 19  |
|                | <i>Mycetochara quadrimaculata</i>        | 13  | 27 | 20 | 40 | 7   | 2  | 109 |

|              |                                   |    |   |   |    |   |   |    |
|--------------|-----------------------------------|----|---|---|----|---|---|----|
|              | <i>Palorus subderpressus</i>      | 0  | 0 | 0 | 5  | 0 | 0 | 5  |
|              | <i>Prionychus ater</i>            | 0  | 0 | 0 | 1  | 0 | 0 | 1  |
|              | <i>Prionychus fairmairei</i>      | 4  | 8 | 0 | 0  | 1 | 0 | 13 |
|              | <i>Pseudocistela ceramboides</i>  | 13 | 3 | 0 | 10 | 0 | 0 | 26 |
|              | <i>Stenohelops sublinearis</i>    | 3  | 1 | 0 | 0  | 0 | 0 | 4  |
|              | <i>Tenebrio cf. codinae</i>       | 0  | 0 | 0 | 3  | 6 | 0 | 9  |
|              | <i>Tenebrio punctipennis</i>      | 24 | 4 | 0 | 0  | 0 | 0 | 28 |
| Trogositidae | <i>Temnochila caerulea</i>        | 0  | 1 | 0 | 0  | 0 | 0 | 1  |
|              | <i>Tenebroides maroccanus</i>     | 0  | 1 | 2 | 0  | 0 | 0 | 3  |
| Zopheridae   | <i>Colydium elongatum</i>         | 4  | 1 | 0 | 10 | 0 | 0 | 15 |
|              | <i>Endophloeus marcovichianus</i> | 11 | 0 | 0 | 4  | 0 | 0 | 15 |
|              | <i>Synchita fallax</i>            | 0  | 0 | 0 | 1  | 0 | 0 | 1  |

---
